# Supplementary material for: Long COVID burden and risk factors in 10 UK longitudinal studies and electronic health records
Source: PubMed Central journal article supplement (PMC9240035; doi:10.1038/s41467-022-30836-0), 2022-06-28
Supplement: 41467_2022_30836_MOESM3_ESM.pdf [file 41467_2022_30836_MOESM3_ESM.pdf]

## **Description of Additional Supplementary Files**

File Name: Supplementary Data 1

Description: Sources: ALSPAC G1 (Children of the Avon Longitudinal Study of Parents and Children); TwinsUK (UK Adult Twin Registry); ALSPAC G0 (parents of ALSPAC).
